# Supplementary material for: Bone marrow mesenchymal stem cell-derived exosomes protect podocytes from HBx-induced ferroptosis
Source: PeerJ. 2023 May 11;11:e15314. doi: 10.7717/peerj.15314 (PMC10183163; doi:10.7717/peerj.15314)
Supplement: Supplemental Information 1 [file peerj-11-15314-s001.xlsx]

## Sheet: Sheet1
	Western Blot
		GPX4	target gene/GAPDH				GPX4	target gene/GAPDH						GPX4	target gene/GAPDH
			Control	Lenti-NC	Lenti-HBx			Control	Lenti-NC	Lenti-HBx	Lenti-HBx+exo				HBx	HBx+exo	HBx+exo+inhibitor NC	HBx+exo+miR-223-3p inhibitor
			1.031	0.981	0.744			1.14801	1.13154	0.738268	0.841669				0.619752	0.980998	0.766075	0.403819
			0.917	0.872	0.664			1.0419	1.01573	0.683681	0.777439				0.623241	0.971881	0.766075	0.398929
			1.058	1.006	0.749			1.03386	1.00096	0.690818	0.794509				0.623911	0.98463	0.767361	0.401747
		ACSL4	Control	Lenti-NC	Lenti-HBx		ACSL4	Control	Lenti-NC	Lenti-HBx	Lenti-HBx+exo			ACSL4	HBx	HBx+exo	HBx+exo+inhibitor NC	HBx+exo+miR-223-3p inhibitor
			0.745	0.865	1.063			0.481917	0.692899	0.897077	0.711976				0.956589	0.744207	1.02205	1.31099
			0.831	0.939	1.193			0.443599	0.675644	0.854675	0.659545				0.955567	0.723724	1.02914	1.30962
			0.965	1.047	1.328			0.521954	0.768811	1.06343	0.80391				0.941605	0.714787	1.0183	1.31121
		SLC7A11	Control	Lenti-NC	Lenti-HBx		SLC7A11	Control	Lenti-NC	Lenti-HBx	Lenti-HBx+exo			SLC7A11	HBx	HBx+exo	HBx+exo+inhibitor NC	HBx+exo+miR-223-3p inhibitor
			1.09	0.924	0.766			1.00491	0.694499	0.427351	0.959168				0.705012	0.975524	0.67473	0.319464
			0.871	0.756	0.636			0.99874	0.706417	0.436993	1.01289				0.703919	0.97982	0.67473	0.30913
			1.013	0.93	0.718			0.975048	0.681054	0.44524	0.997537				0.701813	1.00099	0.67182	0.308091
	CCK-8	OD
		24h	Standard	Control	Lenti-NC	Lenti-HBx		Standard	Control	Lenti-NC	Lenti-HBx	Lenti-HBx+exo		HBx	HBx+exo	HBx+exo+inhibitor NC	HBx+exo+miR-223-3p inhibitor
			0.093	0.384	0.398	0.378		0.135	0.387	0.376	0.377	0.388		0.395	0.439	0.317	0.297
			0.099	0.399	0.378	0.388		0.142	0.379	0.384	0.364	0.377		0.349	0.408	0.358	0.31
			0.116	0.374	0.374	0.397		0.117	0.388	0.368	0.372	0.369		0.317	0.444	0.346	0.236
		48h	0.13	0.576	0.592	0.578		0.145	0.576	0.588	0.536	0.576		0.506	0.652	0.541	0.448
			0.135	0.589	0.565	0.564		0.14	0.566	0.567	0.544	0.577		0.524	0.637	0.609	0.45
			0.141	0.591	0.601	0.568		0.108	0.578	0.591	0.541	0.567		0.606	0.707	0.568	0.458
		72h	0.139	0.766	0.729	0.721		0.145	0.729	0.756	0.662	0.763		1.08	1.285	1.187	0.942
			0.091	0.751	0.793	0.687		0.104	0.746	0.736	0.673	0.765		1.113	1.216	1.144	0.769
			0.102	0.719	0.798	0.701		0.117	0.756	0.77	0.671	0.723		1.161	1.296	1.142	0.77
		96h	0.103	0.932	0.987	0.866		0.113	0.965	0.977	0.832	0.965		1.47	1.604	1.397	1.163
			0.093	0.993	1.001	0.798		0.13	0.945	0.965	0.864	0.967		1.485	1.657	1.473	1.234
			0.129	0.944	0.998	0.865		0.169	0.987	0.973	0.877	0.934		1.533	1.58	1.457	1.216
	Iron
		Control	Lenti-NC	Lenti-HBx		Control	Lenti-NC	Lenti-HBx	Lenti-HBx+exo		HBx+exo	HBx+exo+inhibitor NC	HBx+exo+miR-223-3p inhibitor
		0.548066	0.659359	0.779109		0.615853	0.682897	0.92661	0.75963		0.962846	0.832373	0.904514	1.30264
		0.655882	0.659359	0.861603		0.679562	0.654832	0.893906	0.669674		0.995671	0.77562	0.808742	1.50135
		0.655882	0.602842	0.806607		0.679562	0.57064	0.828498	0.699659		0.930022	0.718868	0.840666	1.26952
	MDA
		Control	Lenti-NC	Lenti-HBx		Control	Lenti-NC	Lenti-HBx	Lenti-HBx+exo		HBx+exo	HBx+exo+inhibitor NC	HBx+exo+miR-223-3p inhibitor
		0.000845	0.00078	0.00117		0.000715	0.000845	0.001105	0.00104		0.001365	0.00091	0.001365	0.002015
		0.000715	0.00065	0.001235		0.00091	0.00091	0.00117	0.000975		0.00156	0.00117	0.001105	0.00195
		0.000845	0.00091	0.00104		0.000845	0.000715	0.001105	0.00078		0.0013	0.001105	0.0013	0.00234
	qRT-PCR	2-∆∆Ct
		GPX4	Control	Lenti-NC	Lenti-HBx		Control	Lenti-NC	Lenti-HBx	Lenti-HBx+exo		HBx+exo	HBx+exo+inhibitor NC	HBx+exo+miR-223-3p inhibitor
			1.17	1.08	0.46		0.99936	0.93509	0.54538	0.99737		0.209	0.391	0.286	0.125
			0.87	1.13	0.4		1.03462	1.01369	0.46604	0.99132		0.205	0.447	0.257	0.118
			0.99	1.14	0.55		0.96853	0.88143	0.46799	0.6934		0.253	0.641	0.222	0.14
		ACSL4	0.85	0.93	2.32		0.92391	0.82943	2.67563	1.53994		4.123	2.176	4.975	10.908
			1.01	0.98	2.07		0.93866	0.78879	2.39918	1.67686		4.664	2.602	4.347	8.773
			1.15	1.12	2.83		1.15484	0.95726	2.83323	1.60898		4.898	3.534	4.342	10.207
		SLC7A11	0.87	1.03	0.21		0.81063	0.80883	0.17563	0.86938		0.382	0.554	0.502	0.339
			1.02	1.03	0.23		1.03762	0.9528	0.27737	0.94439		0.368	0.704	0.385	0.305
			1.12	1.16	0.27		1.17883	1.08495	0.25842	1.05055		0.456	0.891	0.409	0.386
		miR-223-3p	Control	HBx	HBx+exo	HBx+exo+inhibitor NC	HBx+exo+miR-223-3p inhibitor
			1	0.439	0.61	0.405	0.226
			0.932	0.381	0.581	0.519	0.18
			0.847	0.444	0.646	0.396	0.157
